# Supplementary material for: Cervicovaginal Microbiota Profiles in Precancerous Lesions and Cervical Cancer among Ethiopian Women
Source: MDPI journal article supplement (doi:10.3390/microorganisms11040833), 2023-03-24
Supplement: s1 [file s1]

Supplementary Table S1

Histological/Cytological status of study participants based on age category.

|           | Isohelix TM DNA<br>Buccal swab | Evalyn Brush |
|-----------|--------------------------------|--------------|
| Cancer    | 60                             | 0            |
| Dysplasia | 6                              | 19           |
| none      | 1                              | 34           |

Supplementary Table s2

Histological/Cytological status of study participants based on type of sample collection device

|           | <50 years | >50 years |
|-----------|-----------|-----------|
| Cancer    | 28        | 32        |
| Dysplasia | 22        | 2         |
| none      | 34        | 1         |
