# Supplementary material for: Cervicovaginal Microbiota Profiles in Precancerous Lesions and Cervical Cancer among Ethiopian Women
Source: Microorganisms. 2023 Mar 24;11(4):833. doi: 10.3390/microorganisms11040833 (PMC10144031; doi:10.3390/microorganisms11040833)
Supplement: Supplementary file 1 [file microorganisms-11-00833-s001.zip]

Archive with 5 entries (5 files):
- microorganisms-2225406-supplementary tables.pdf
- Supplementary Figure S1.pdf
- Supplementary Figure S2.pdf
- Supplementary Figure S3.pdf
- Supplementary Figure S4.pdf
