# Supplementary figures and images for: Cervicovaginal Microbiota Profiles in Precancerous Lesions and Cervical Cancer among Ethiopian Women
Source: MDPI journal article supplement (doi:10.3390/microorganisms11040833), 2023-03-24

**A**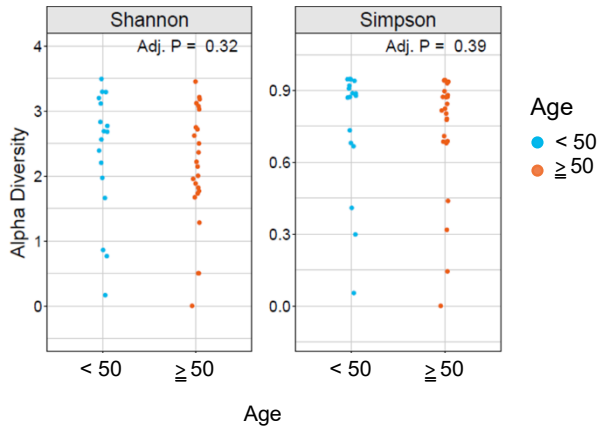**B**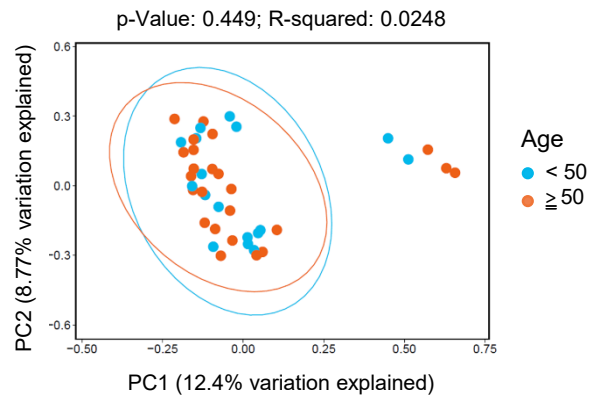**C**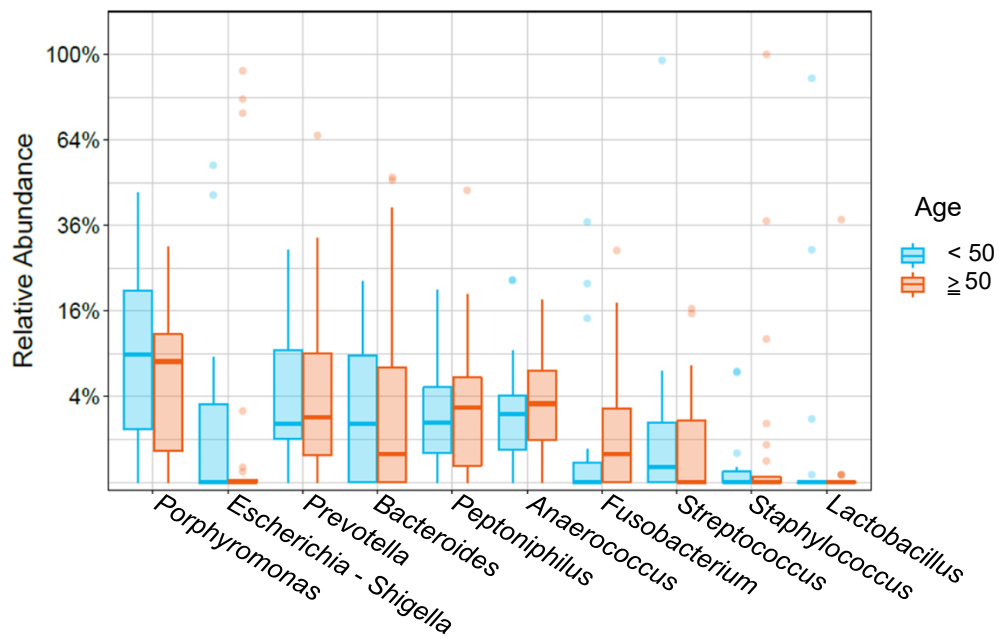

Supplement: s1 [file s1]

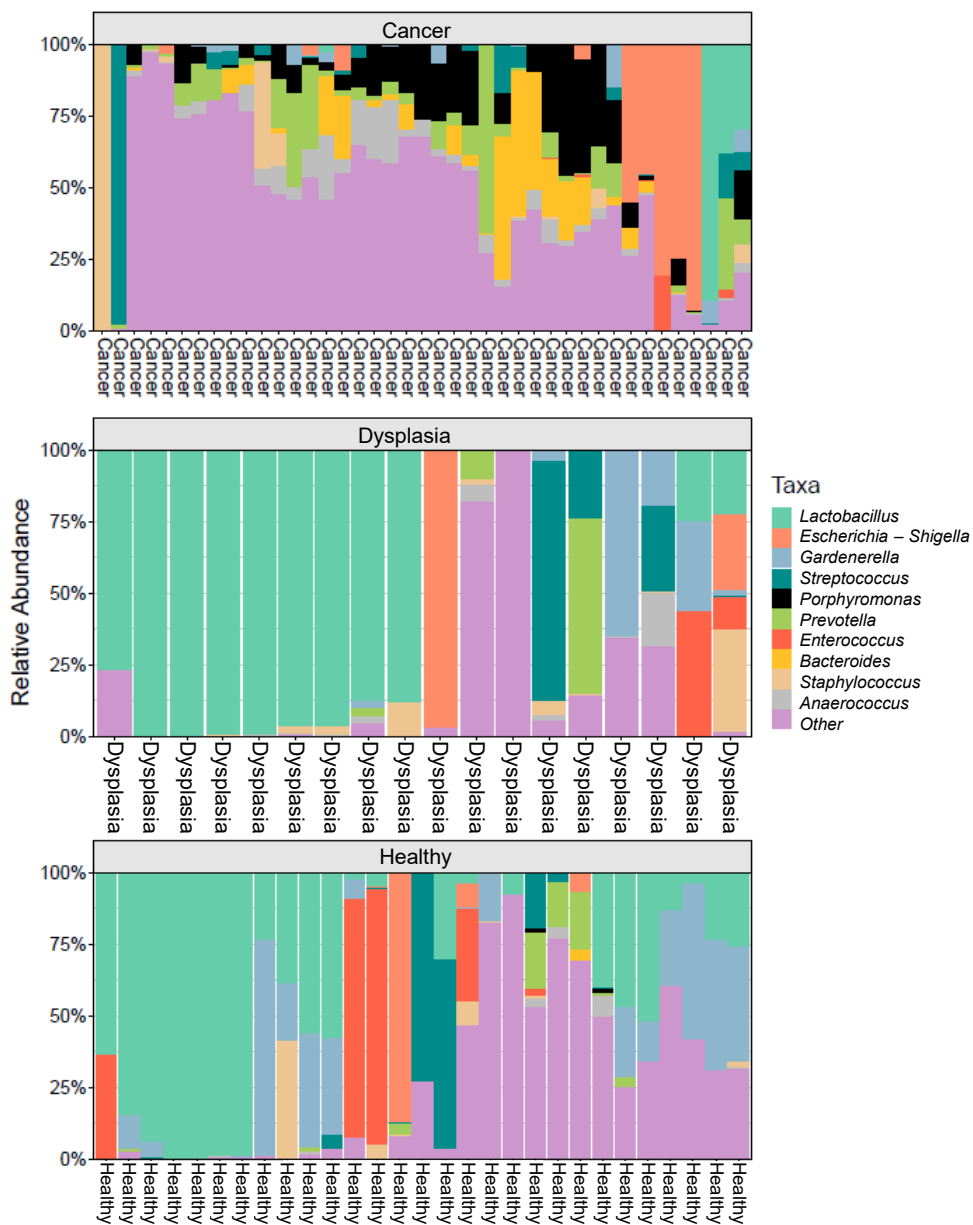

Supplement: s1 [file s1]

A

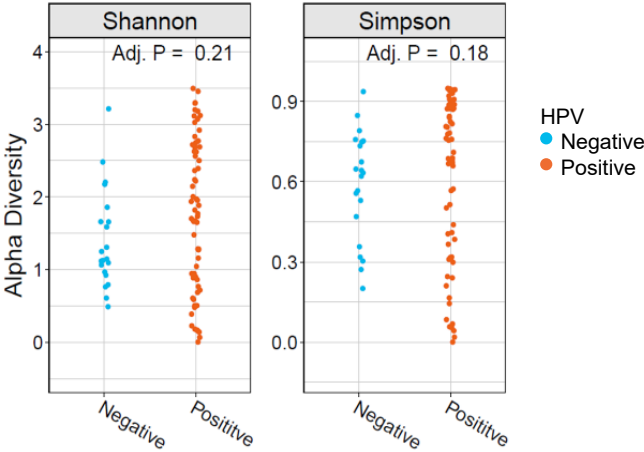

B

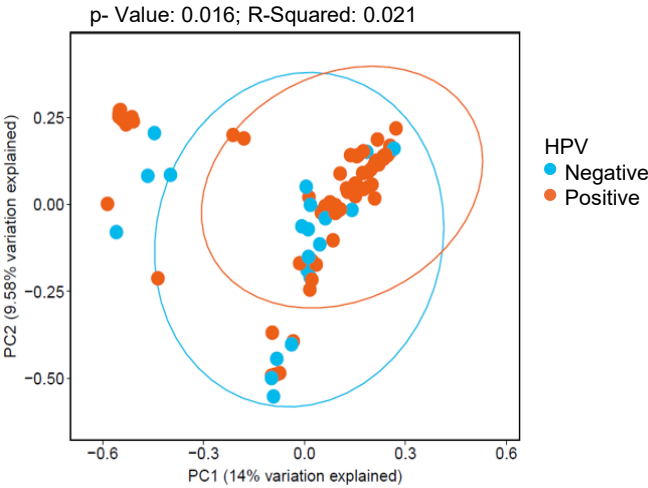

Supplement: s1 [file s1]

A

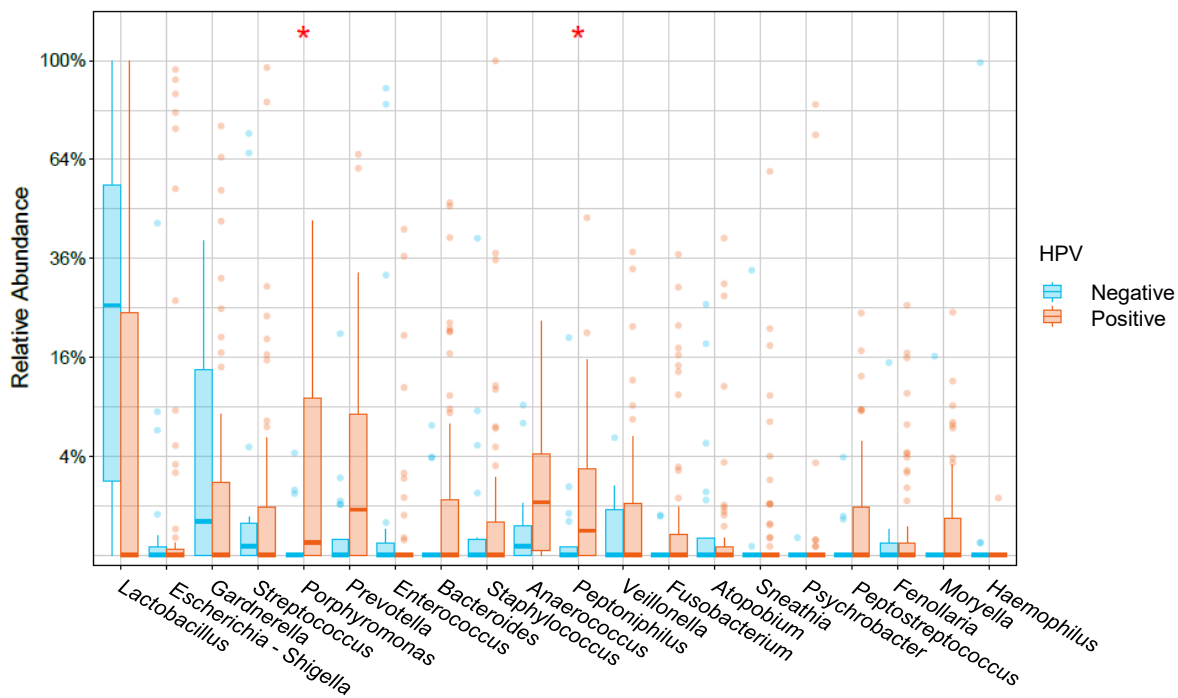

B

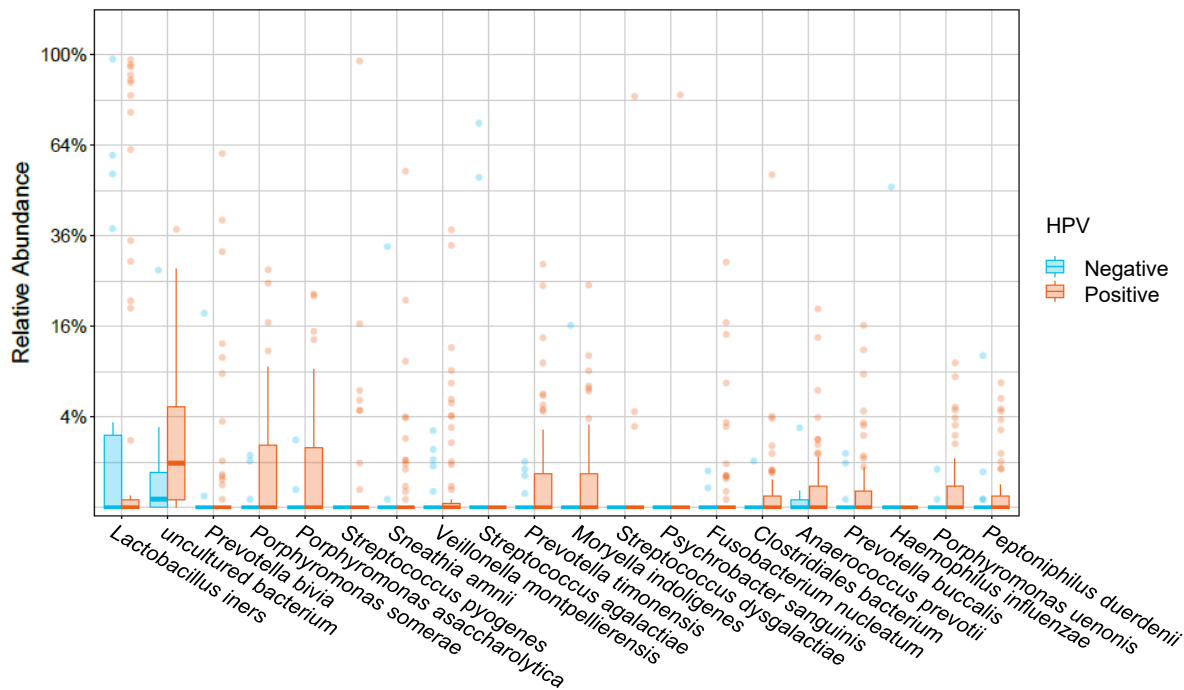

Supplement: s1 [file s1]
